# Supplementary material for: MCM-GINS and MCM-MCM interactions in vivo visualised by bimolecular fluorescence complementation in fission yeast
Source: PubMed Central journal article supplement (PMC2652428; doi:10.1186/1471-2121-10-12), 2009-02-19
Supplement: 1471-2121-10-12-S1.pdf [file 1471-2121-10-12-S1.pdf]

---

## Additional file 1: Oligonucleotide primers

---

### A. Primers for plasmid construction

VN173-5-Pac            5' -GTGTGTGGTTTTAATTAAAGTCGACTCTAGAAGATCCATC-3'  
VN173-3-Asc            5' -GTGTGTGGTTGGCGCGCCTACTCGATGTTGTGGCGGATC-3'  
VC155-5-Pac            5' -GGTTGTGTGTTTAATTAATACCCGTCCGGCGTGCAAAATC-3'  
VC155-3-Asc            5' -GGTTGTGTGTGGCGCGCCTACTTGTACAGCTCGTCCATG-3'

Restriction sites (*PacI* or *AscI*) are underlined.

### B. Primers for PCR-mediated gene tagging

MCM2-CTAG-5            5' -TGATTATTGATTCCTTTGTGAATGCCAAAAAATGAGTGT  
TAAACGAAGTTTGTCAAGAACATTTGCTAAATATCTTATTCGGATCCCCGGGTTAATTAA-3'  
MCM2-CTAG-3            5' -ATAAAAAATGTAAAGCAAATTTTGATTGCAAATTAATTAAG  
GATAGATATATGCAACAGATGCAGTAACAAAAGGAGGGTCGAATTCGAGCTCGTTTAAAC-3'  
MCM4-CTAG-5            5' -GTGCTTTGGAAAGGCGAGGACGTATTAAGGTTATTACCAG  
TGCTGGACATCGCATTGTACGTTCAATTGCACAGACTGATCGGATCCCCGGGTTAATTAA-3'  
MCM4-CTAG-3            5' -AAATATGTAAAAATTTTTATAACAAAAGAACGTGTGTA  
TATATAACAAGAAAGACATTCGTATTATGCTCTGTAGTCTGAATTCGAGCTCGTTTAAAC-3'  
CDC45-CTAG-5            5' -GTTTGAAGCAAGTGTGATTGAGTGTCAAAAAAGTGACCT  
CGGGGTTTTTTTAGAAAAGTCTGTCCCTCAAACACTATTACGGATCCCCGGGTTAATTAA-3'  
CDC45-CTAG-3            5' -CTTACATCAGTTGATATCCATACTTATTTACGTGTAATTT  
TAATTAGATGAATTAATATTTCTTTATTAGCAAAATTCGAATTCGAGCTCGTTTAAAC-3'  
PSF1-CTAG-5            5' -ACCTTACTAAAAATTCACAAATGCATGTGCGTGCTACAGA  
CGTTGAACGACTCATTGCCCAAGGTTTTTTGGCTAAGTTACGGATCCCCGGGTTAATTAA-3'  
PSF1-CTAG-3            5' -ATGGTAGGAATGAATGGCTTATGGATGAAATTTTTAGGGT  
CAGTTCAAAAAGCAGTGAAACTCTTATTTGGGAAACAGAGGAATTCGAGCTCGTTTAAAC-3'  
PSF2-CTAG-5            5' -TGAAAATTAACGAAATACGTCCATATTTTCGAGAGGTGAT  
GGACAGAATGCGCAAAATTTGTTCAAGTTTCCAAGAAGAACGGATCCCCGGGTTAATTAA-3'  
PSF2-CTAG-3            5' -ATTTCACTACTACAAAAGTTGGTATTCATAAACACTTCGTA  
GGATTCATTATCATTATTTTAAAGTACATCATCCACACGGAATTCGAGCTCGTTTAAAC-3'

Sequences annealing to pFA6a-based plasmids are underlined.

### C. Primers for detection and sequencing of tagged genes

|               |                                       |
|---------------|---------------------------------------|
| MCM2-200      | 5' -CGATATGAGACGCGAGTCACTGGC-3'       |
| MCM4-200      | 5' -TGAAGATATGGTCAAAGAACTGGC-3'       |
| CDC45-200     | 5' -GGTACTTAATAGTTGGAACCTCTA-3'       |
| PSF1-SEQ1     | 5' -AAGGACGTTGGAGATATTGA-3'           |
| PSF2-SEQ1     | 5' -ATTAATGAAGTTCAACTAAC-3'           |
| MCM2-150      | 5' -GCGTCATCTGGAGTCTGCTATCCG-3'       |
| MCM4-150      | 5' -TATGTTGGTCAGTCAATTGTTAAC-3'       |
| CDC45-100     | 5' -AGAGGTTGCAAACATGACATCTGC-3'       |
| PSF1-SEQ2     | 5' -TTGGTCCGAGCTGGATTTGA-3'           |
| PSF2-SEQ2     | 5' -GGATATCAGGAGGATTTTGC-3'           |
| KANNATMX6-REV | 5' -CCCTGCTCGCAGGTCTGCAGCGAGGAGCCG-3' |

---
