# Supplementary material for: MCM-GINS and MCM-MCM interactions in vivo visualised by bimolecular fluorescence complementation in fission yeast
Source: PubMed Central journal article supplement (PMC2652428; doi:10.1186/1471-2121-10-12), 2009-02-19
Supplement: 1471-2121-10-12-S2.pdf [file 1471-2121-10-12-S2.pdf]

---

**Additional file 2: BiFC strain construction**

---

|                               | <i>psf1-</i><br><i>VN173</i> | <i>psf2-</i><br><i>VN173</i> | <i>mcm2-</i><br><i>VN173</i> | <i>mcm4-</i><br><i>VN173</i> |
|-------------------------------|------------------------------|------------------------------|------------------------------|------------------------------|
| <i>psf1-</i><br><i>VC155</i>  | -                            | Synthetic<br>lethal          | Synthetic<br>lethal          | Synthetic<br>lethal          |
| <i>psf2-</i><br><i>VC155</i>  | Synthetic<br>lethal          | -                            | Synthetic<br>lethal          | Synthetic<br>lethal          |
| <i>mcm4-</i><br><i>VC155</i>  | Viable<br>(BiFC)             | Synthetic<br>lethal          | Synthetic<br>lethal          | -                            |
| <i>cdc45-</i><br><i>VC155</i> | Viable<br>(no BiFC)          | Synthetic<br>lethal          | Synthetic<br>lethal          | Synthetic<br>lethal          |
